# Supplementary material
Source: Springer Nature journal article supplement (https://www.springermedizin.de/resource/supplementary/12874_2011_693_MOESM5_ESM.pdf/9432400)

$0.05 \leq maf \leq 0.20$   
 $D \leq -0.005$

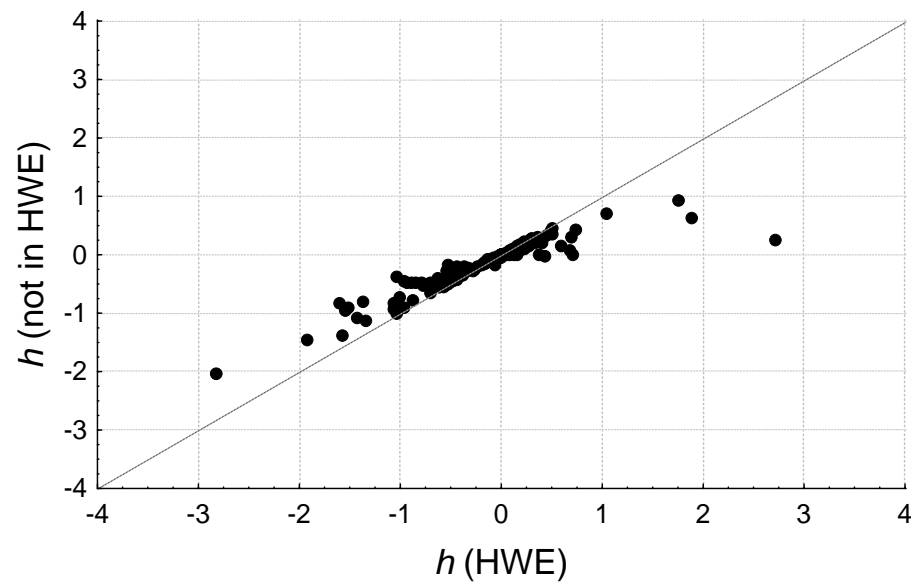

$0.20 \leq maf \leq 0.40$   
 $D \leq -0.005$

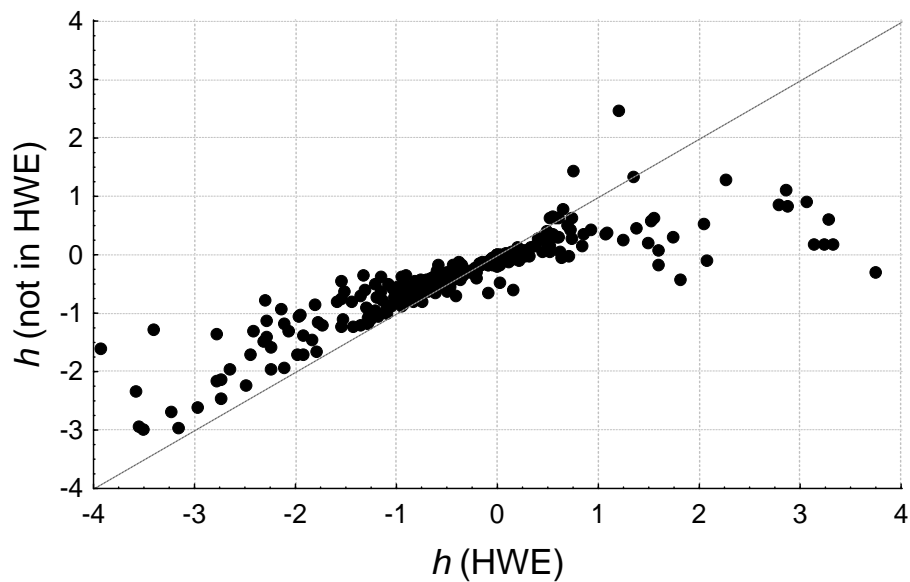

$0.05 \leq maf \leq 0.20$   
 $D \geq 0.005$

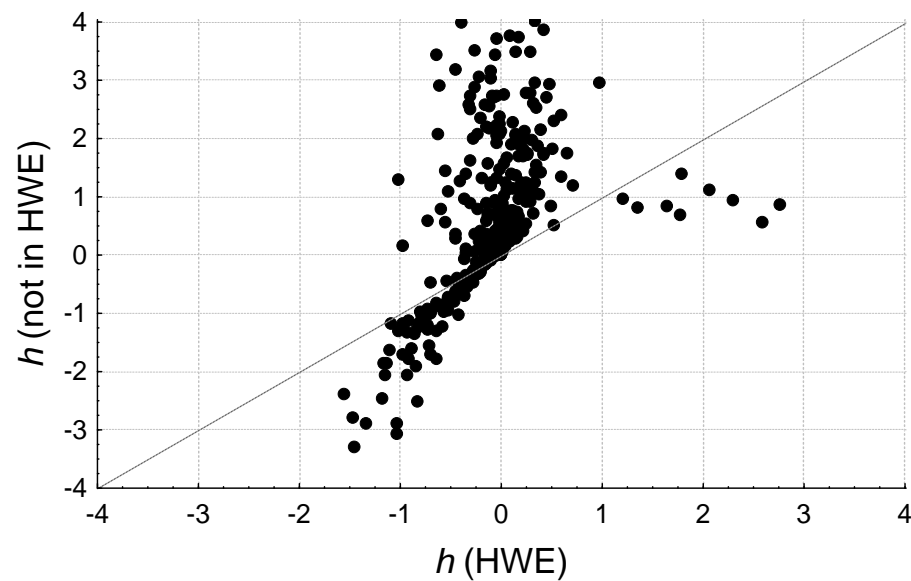

$0.20 \leq maf \leq 0.40$   
 $D \geq 0.005$

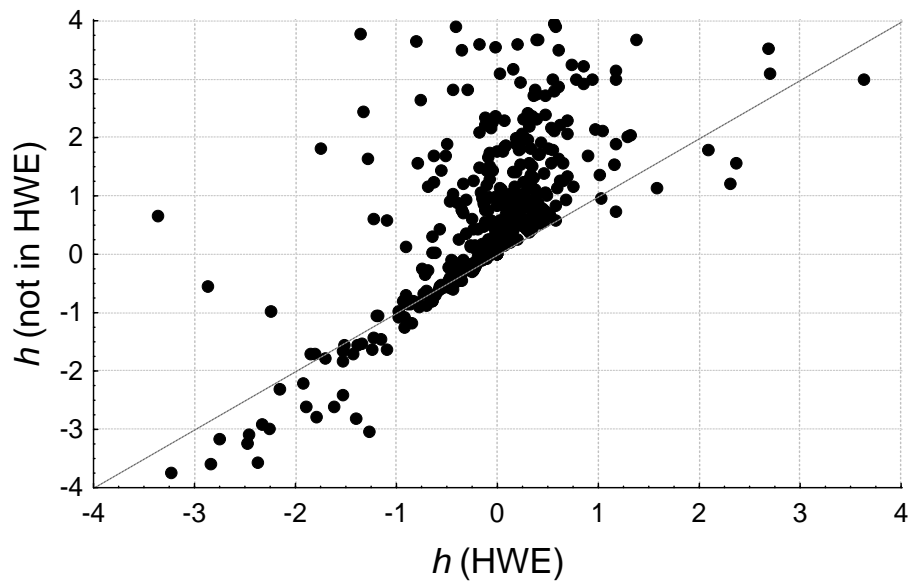

Supplement: MOESM5 [file 9432400]
